# Supplementary material for: Hollow MOF-derived CoNi/C composites as effective electromagnetic absorbers in the X-band and Ku-band
Source: Royal Society of Chemistry journal article supplement (doi:10.1039/d1tc04645d), 2021-12-09
Supplement: d1tc04645d1.pdf [file d1tc04645d1.pdf]

## Hollow MOF-Derived CoNi/C Composites as Effective Electromagnetic Absorbers in the X-band and Ku-band

Yadi Yu <sup>a,b</sup>, Yi Fang <sup>a,b,\*</sup>, Qi Hu <sup>a,b</sup>, Xueni Shang <sup>a,b</sup>, Chengchun Tang <sup>a,b</sup>, Fanbin Meng <sup>a,b,\*</sup>

<sup>a</sup> School of Materials Science and Engineering, Hebei University of Technology, Tianjin 300130, China.

<sup>b</sup> Hebei Key Laboratory of Boron Nitride Micro and Nano Materials, Hebei University of Technology, Tianjin 300130, China.

\* Corresponding author: Tel: +86 022 60202660.

E-mail: [fangyi@hebut.edu.cn](mailto:fangyi@hebut.edu.cn) (Yi Fang), [mengfanbin620@163.com](mailto:mengfanbin620@163.com) (Fanbin Meng).

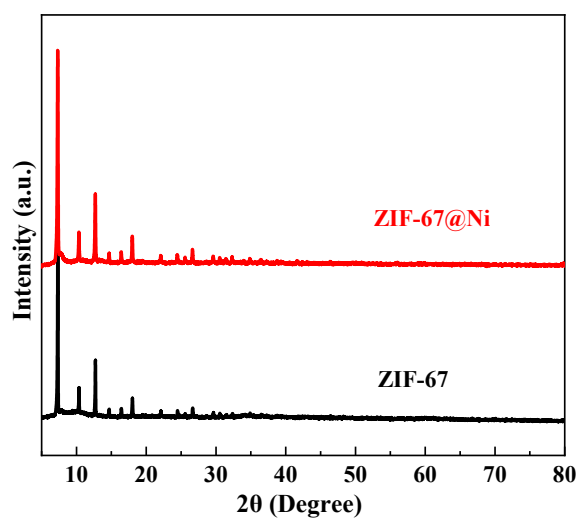

Figure S1. XRD patterns of ZIF-67 and ZIF-67@Ni.

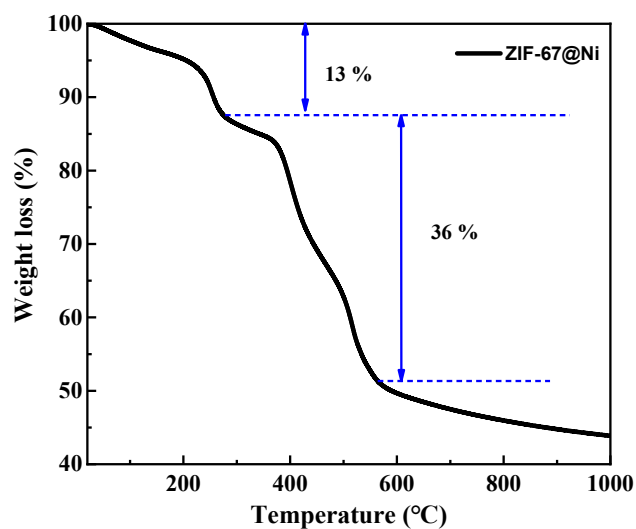

Figure S2. TGA curve of ZIF-67@Ni in a N<sub>2</sub> atmosphere.

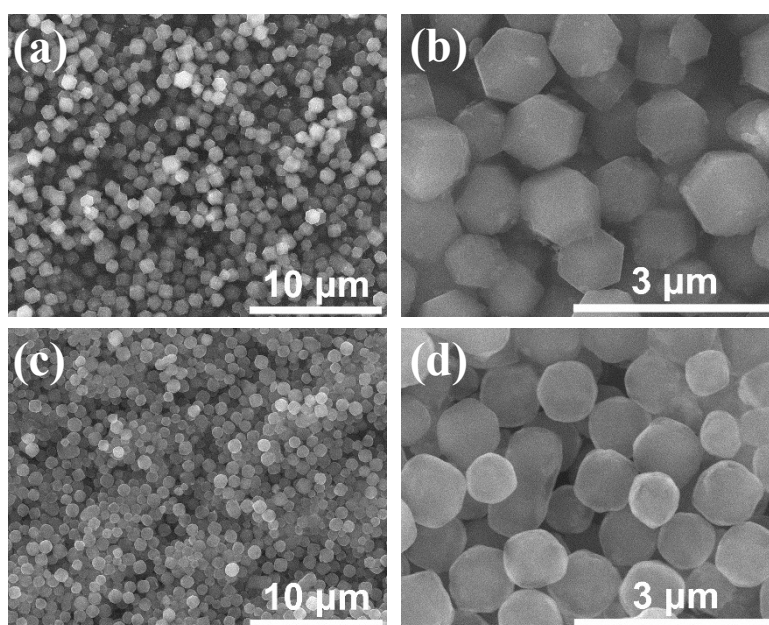

Figure S3. SEM images of (a, b) ZIF-67 and (c, d) ZIF-67@Ni.

Table S1. Specific surface area and total pore volume of ZIF-67@Ni and CoNi-700.

| Sample    | $S_{\text{BET}}$ (m <sup>2</sup> g <sup>-1</sup> ) | $S_{\text{DFT}}$ (m <sup>2</sup> g <sup>-1</sup> ) | $V_{\text{pore}}$ (cm <sup>3</sup> g <sup>-1</sup> ) |
|-----------|----------------------------------------------------|----------------------------------------------------|------------------------------------------------------|
| ZIF-67@Ni | 1289.83                                            | 1070.57                                            | 0.543                                                |
| CoNi-700  | 135.05                                             | 108.80                                             | 0.137                                                |

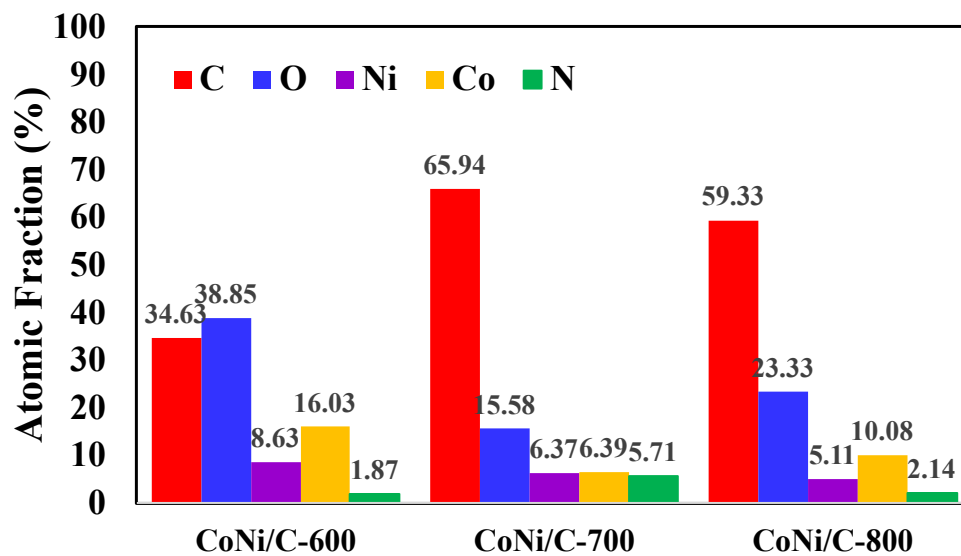

Figure S4. The XPS histogram of product composition in different pyrolysis temperatures.

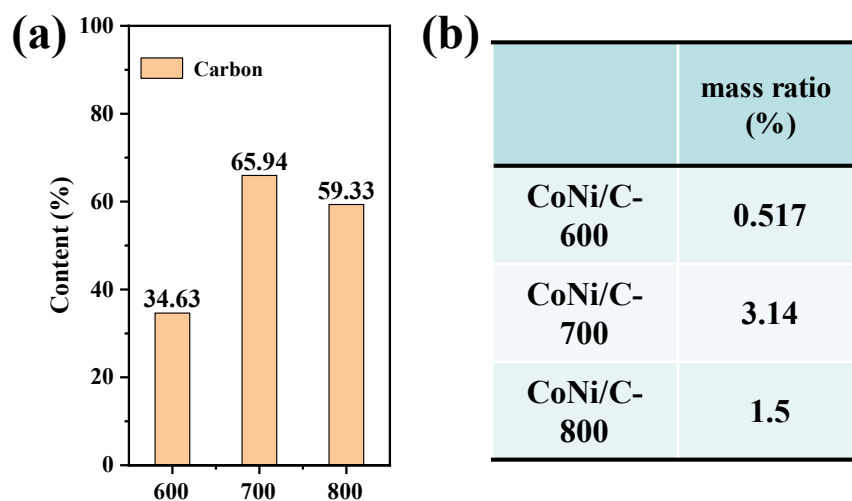

Figure S5. Carbon content was determined by XPS (a) and carbon sulfur analyzer (b).
